# Supplementary material
Source: bioRxiv or medRxiv preprint supplement (https://www.biorxiv.org/highwire/filestream/136498/field_highwire_adjunct_files/0/454660-1.pdf)
Supplement: Supplementary file [file 454660-1.pdf]

## **Supplementary Appendix**

This appendix has been provided by the authors to give readers additional information about their work.

Supplement to:

**Human Handedness: Genetics, Microtubules, Neuropsychiatric Diseases and Brain Language Areas**

A. Wiberg\*, G. Douaud\*, M. Ng, Y. Al Omran, F. Alfaro-Almagro, J. Marchini, D.L. Bennett, S. Smith, D. Furniss

\*Equal contribution

## Table of Contents

### 1. Supplementary Methods

### 2. Supplementary Tables

*Supplementary Table S1: Results of the permutation analysis for microtubule/cytoskeletal genes*

*Supplementary Table S2: MAGMA Gene-Set Analysis*

*Supplementary Table S3: Full results of SNP-based enrichment analysis with XGR*

*Supplementary Table S4: Genetic correlation results between handedness and 14 neuro-psychiatric phenotypes executed in LDHub.*

*Supplementary Table S5: Significant genotype:IDP associations*

*Supplementary Table S6: Significant handedness:IDP associations*

### 3. Supplementary Figures

*Supplementary Figure S1: Heat map of gene expression across 53 tissue types*

*Supplementary Figure S2: Summary of results from the genetics-handedness, genetics-brain imaging, and handedness-brain imaging studies.*

## **Supplementary Methods**

### **Ethical approval**

UK Biobank has approval from the North West Multi-Centre Research Ethics Committee (11/NW/0382), and this study has UK Biobank study IDs 8107 and 22572.

### **Phenotype definition**

For the GWAS, we used the UK Biobank resource, a prospective cohort study of ~500,000 individuals from the UK, aged between 40-69, who have had whole-genome genotyping undertaken, and have allowed linkage of these data with their medical records<sup>1,2</sup>.

For the three genotype:handedness association studies, we used self-reported handedness as recorded in UK Biobank Data Field 1707 – participants were invited to answer the question, "Are you right or left handed?", and could choose between “Right-handed”, “Left-handed”, and “Use both right and left hands equally” (ambidextrous). There were up to three instances when participants were asked this question; any participants who gave inconsistent responses were excluded from being classified as one of the three handedness phenotypes.

### **Genotyping**

The genotyping, QC and imputation methodology employed by UK Biobank are described in detail elsewhere<sup>3</sup>. Briefly, UK Biobank contains genotypes of 488,377 participants who were genotyped on two very similar genotyping arrays: UK BiLEVE Axiom Array (807,411 markers; 49,950 participants), and UK Biobank Axiom Array (825,927 markers; 438,427 participants). The two arrays are very similar, sharing approximately 95% of marker content. Genotypes were called from the array intensity data, in 106 batches of approximately 4700 samples each using a custom genotype-calling pipeline.

### **Quality Control**

QC was performed using PLINK<sup>4</sup> v1.9 and R v3.3.1. We initially removed all SNPs with a call rate <90%, accounting for the two different genotyping platforms used to genotype the individuals. We then proceeded to sample-level QC and excluded individuals with one or more of the following: (1) call rate <98%, (2) discrepancy between genetically inferred sex (Data Field 22001) and self-reported sex (Data Field 31), or individuals with sex chromosome aneuploidy (Data Field 22019), (3) heterozygosity >3 S.D. from the mean (calculated using UK Biobank’s PCA-adjusted

heterozygosity values, Data Field 20004). We subsequently excluded individuals who were not flagged by UK Biobank as having white British ancestry (on the basis of principal component analysis and self-reporting as “British” – Data Field 22006). We merged our data with publicly available data from the 1000 Genomes Project<sup>5</sup> and performed principal components analysis (PCA) using flashpca<sup>6</sup> to confirm that the white British ancestry individuals from UK Biobank overlapped with the “GBR” individuals from the 1000 Genomes Project. As we were using BOLT-LMM in our analysis, there were no sample exclusions based on relatedness<sup>7</sup>. 86,693 individuals were excluded based on the above criteria. We then performed SNP-level QC, by excluding SNPs with Hardy-Weinberg equilibrium (HWE)  $p < 10^{-4}$ ,  $< 98\%$  call rate, and  $MAF < 1\%$ . 230,562 SNPs were excluded in total. Finally, we excluded six individuals who harboured an abnormal number of SNPs with a minor allele count (MAC) of 1, which were visual outliers when autosomal heterozygosity was plotted against call rate. This resulted in a final dataset of 401,667 individuals and 547,011 SNPs.

## **Imputation**

UK Biobank’s method of phasing and imputation of SNPs is described in detail elsewhere<sup>3</sup>. Briefly, phasing on the autosomes was performed using SHAPEIT3<sup>8</sup>, using the 1000 Genomes Phase 3 dataset as a reference panel. For imputation, both the HRC (Haplotype Reference Consortium) reference panel<sup>9</sup> and a merged UK10K / 1000 Genomes Phase 3 panel were used. This resulted in a dataset with 92,693,895 autosomal SNPs, short indels and large structural variants. Imputation files were released in the BGEN (v1.2) file format.

## **Association Analysis**

We undertook a genome-wide association analysis across 547,011 genotyped SNPs and ~11 million imputed SNPs from the HRC panel with  $MAF \geq 0.001$  and  $Info\ Score \geq 0.3$ , using a linear mixed non-infinitesimal model implemented in BOLT-LMM v2.3<sup>10</sup>. We used a reference genetic map file for hg19 and a reference linkage disequilibrium (LD) score file for European-ancestry individuals included in the BOLT-LMM package in the analysis. Two covariates were used in the association study: genetic sex and the genotyping platform (to account for array effects). The LD score regression intercept<sup>11</sup> of 1.0107 with an attenuation ratio of 0.1032 indicated minimal inflation when adjusted for the large sample size. Conditional analysis at each associated locus was performed by conditioning on the allelic dosage (calculated using QCTOOL v2) of the most significantly associated SNP at each locus.

## **In silico analyses of associated SNPs and regions**

For the left- vs right-handers GWAS, we used FUMA<sup>12</sup> (FUNCTIONAL Mapping and Annotation of genetic associations) to map genes to the three associated loci based on physical position in the genome (positional mapping), resulting in 13 mapped genes. In order to gain insight into the relative tissue expressions of these mapped genes in a broad range of tissues, we used the GENE2FUNC tool in FUMA to look at the average expression of

these genes across 53 GTEx v7 tissue types. The heat map (Supplementary Figure S1) clearly demonstrates relatively high expression for the majority of these genes in 13 brain tissue types (particularly *MAP2*, *MAPT*, *NSF*) over other tissues types.

Also for the left- vs right-handers GWAS, we performed a gene-set analysis in MAGMA<sup>13</sup> (multi-marker analysis of genomic annotation), implemented in FUMA. MAGMA uses a gene-based (rather than SNP-based) GWAS approach, whereby SNPs that are located within protein-coding genes (based on locations in NCBI build 37) are assigned a p-value describing the association found with left-handedness. The MAGMA gene-set analysis is performed for curated gene sets and GO terms obtained from MsigDB v6.1 (10655 gene sets - curated gene sets: 4738, GO terms: 5917). The top 10 significant gene sets with a Bonferroni-corrected p-value of  $< 0.05$  are shown in Supplementary Table S2, ranked by the number of overlapped genes.

To identify the biological and cellular pathways underlying the association signals, we performed enrichment analyses for SNPs and genes using XGR<sup>14</sup>, a software that assists in the interpretation of GWAS statistics by incorporating ontology, annotation, and systems biology network-driven approaches. We performed a SNP-based enrichment analysis for 4,007 SNPs with a p-value suggestive of association of  $p < 5 \times 10^{-5}$  in the left- vs right-handers GWAS, excluding SNPs in LD. The results from this analysis are shown in Supplementary Table S3.

We performed LD score regression<sup>15,16</sup> on summary-level statistics for the left- vs right-handers GWAS to estimate the SNP heritability, and to estimate the genetic correlation between handedness and various neurological and psychiatric diseases from publicly available summary-level GWAS data. This analysis was performed in LD Hub (see URLs). We took our summary-level GWAS data from the left- vs right-handers GWAS, keeping only the SNPs provided by LD Hub (downloaded from [http://ldsc.broadinstitute.org/static/media/w\\_hm3.noMHC.snplist.zip](http://ldsc.broadinstitute.org/static/media/w_hm3.noMHC.snplist.zip)). This retained 27 genome-wide significant SNPs from our GWAS. We calculated the heritability ( $h^2$ ) of handedness explained by all the SNPs in the left- vs right-handers GWAS to be 0.0121 (standard error 0.0014). For the genetic correlation studies with handedness, we selected 14 phenotypes from the ‘neurological diseases’ and ‘psychiatric diseases’ categories on LDHub. Results are shown Supplementary Table S4.

Brain expression quantitative trait loci (eQTLs) were obtained from the UK Brain Expression Consortium (UKBEC) dataset<sup>17</sup> and from GTEx<sup>18</sup> (See URLs).

## Imaging Analysis

All UK Biobank imaging data were processed following pipelines designed to create a set of imaging-derived phenotypes (IDPs) which summarises the information across all brain structural and functional modalities<sup>19,20</sup>. These pipelines were developed mostly using FSL tools. A description of a recently expanded set of 3,144 IDPs, including grey matter volumetric, thickness and area measures, has been recently published<sup>21</sup>. IDPs were quartile normalised to ensure normality, and confounds, including age, sex, interaction between age and sex, head size, as well as various variables

related to the MRI acquisition protocol, were included in the model.

For the genotype-imaging study, we used BGENIE v1.2 (see URLs) to carry out GWA analyses of significant loci for handedness against each of the processed IDPs. Results were considered significant after Bonferroni correction for multiple comparisons across all IDPs and loci.

As all the participants' structural and functional images are non-linearly registered to a common space<sup>20</sup>, we were then able to carry out a voxel-by-voxel analysis of the most significant modalities identified with our IDPs using regression against the count of the non-reference allele (0, 1 and 2). This was performed to display the spatial extent of the relevant variants' effects, and to investigate whether any apparent lateralisation of the IDP results might be due to slight difference in significance (relative to threshold). Results were considered significant after Bonferroni correction for multiple comparisons across space (number of voxels in the image mask used to carry out the statistical analyses).

Significant voxelwise, localised results were subsequently used as starting points (seed masks) for the virtual reconstruction and identification of the white matter tracts to which they belong. For this, we ran the probabilistic tractography tool from FSL<sup>22</sup> (probtrackx) with default settings on 100 randomly chosen imaged UK Biobank participants.

For the imaging-handedness study, we carried out the same analyses - first across IDPs, second of voxel-by-voxel study of relevant modalities, lastly using tractography for those results that might be in the white matter - to directly test the effects of self-reported handedness. The first analysis was performed on the subset of imaged UK Biobank participants used in the initial GWAS, by directly contrasting n=721 left-handers with n=6,685 right-handers, while the second voxelwise analysis was carried out on the expanded most recent full set (n=1,180 left-handers vs n=11,458 right-handers). All analyses excluded ambidextrous participants.

#### URLs:

**PLINK** <http://www.cog-genomics.org/plink/2.0/>

**BGENIE** <https://jmarchini.org/bgenie/>

**UK Biobank** [www.ukbiobank.ac.uk/](http://www.ukbiobank.ac.uk/)

**GTE<sub>x</sub> Portal** <http://gtexportal.org/home/>

**XGR** <http://galahad.well.ox.ac.uk:3020/>

**R** <https://www.r-project.org>

**1000 Genomes Project** <http://www.1000genomes.org>

**QCTOOL v2** [http://www.well.ox.ac.uk/~gav/qctool\\_v2/#overview](http://www.well.ox.ac.uk/~gav/qctool_v2/#overview)

**UK Braine Expression Consortium (UKBEC)** <http://www.braineac.org>

**LD Hub** <http://ldsc.broadinstitute.org/ldhub/>

**MsigDB** <http://software.broadinstitute.org/gsea/msigdb/index.jsp>

**FUMA** <http://fuma.ctglab.nl/>

**MAGMA** <https://ctg.cncr.nl/software/magma>

## References for Supplementary Methods:

1. Sudlow C, Gallacher J, Allen N, et al. UK Biobank: An Open Access Resource for Identifying the Causes of a Wide Range of Complex Diseases of Middle and Old Age. *PLoS Med* 2015;12(3):e1001779.
2. Collins R. What makes UK Biobank special? *Lancet*. 2012;379(9822):1173–4.
3. Bycroft C, Freeman C, Petkova D, et al. Genome-wide genetic data on ~500,000 UK Biobank participants. *bioRxiv* [Internet] 2017; Available from: <https://www.biorxiv.org/content/early/2017/07/20/166298>
4. Purcell S, Neale B, Todd-Brown K, et al. PLINK: A Tool Set for Whole-Genome Association and Population-Based Linkage Analyses. *Am J Hum Genet* [Internet] 2007;81(3):559–75. Available from: <http://linkinghub.elsevier.com/retrieve/pii/S0002929707613524>
5. 1000 Genomes Project Consortium, Auton A, Brooks LD, et al. A global reference for human genetic variation. *Nature* [Internet] 2015;526(7571):68–74. Available from: <http://www.ncbi.nlm.nih.gov/pubmed/26432245> <http://www.pubmedcentral.nih.gov/articlerender.fcgi?artid=PMC4750478>
6. Abraham G, Inouye M. Fast principal component analysis of large-scale genome-wide data. *PLoS One* 2014;9(4):e93766.
7. Loh P-R, Kichaev G, Gazal S, Schoech A, Price A. Mixed model association for biobank-scale data sets. *bioRxiv* [Internet] 2017; Available from: <https://www.biorxiv.org/content/biorxiv/early/2017/09/27/194944.full.pdf>
8. O’Connell J, Sharp K, Shrine N, et al. Haplotype estimation for biobank-scale data sets. *Nat Genet* 2016;48(7):817–20.
9. McCarthy S, Das S, Kretzschmar W, et al. A reference panel of 64,976 haplotypes for genotype imputation. *Nat Genet* 2016;48(10):1279–83.
10. Loh P-R, Tucker G, Bulik-Sullivan BK, et al. Efficient Bayesian mixed-model analysis increases association power in large cohorts. *Nat Genet* [Internet] 2015;47(3):284–90. Available from: <http://www.nature.com/doifinder/10.1038/ng.3190>
11. Bulik-Sullivan BK, Loh P-R, Finucane HK, et al. LD Score regression distinguishes confounding from polygenicity in genome-wide association studies. *Nat Genet* [Internet] 2015;47(3):291–5. Available from: <http://www.nature.com/doifinder/10.1038/ng.3211>
12. Watanabe K, Taskesen E, Van Bochoven A, Posthuma D. Functional mapping and annotation of genetic associations with FUMA. *Nat Commun* 2017;8(1).



13. de Leeuw CA, Mooij JM, Heskes T, Posthuma D. MAGMA: Generalized Gene-Set Analysis of GWAS Data. *PLoS Comput Biol* 2015;11(4).
14. Fang H, Knezevic B, Burnham KL, Knight JC. XGR software for enhanced interpretation of genomic summary data, illustrated by application to immunological traits. *Genome Med* [Internet] 2016;8(1):129. Available from: <http://genomemedicine.biomedcentral.com/articles/10.1186/s13073-016-0384-y>
15. Zheng J, Erzurumluoglu AM, Elsworth BL, et al. LD Hub: A centralized database and web interface to perform LD score regression that maximizes the potential of summary level GWAS data for SNP heritability and genetic correlation analysis. *Bioinformatics* 2017;33(2):272–9.
16. Bulik-Sullivan B, Finucane HK, Anttila V, et al. An atlas of genetic correlations across human diseases and traits. *Nat Genet* [Internet] 2015;47(11):1236–41. Available from: <http://dx.doi.org/10.1038/ng.3406>
17. Ramasamy A, Trabzuni D, Guelfi S, et al. Genetic variability in the regulation of gene expression in ten regions of the human brain. *Nat Neurosci* 2014;17(10):1418–28.
18. Aguet F, Ardlie KG, Cummings BB, et al. Genetic effects on gene expression across human tissues. *Nature* [Internet] 2017;550(7675):204–13. Available from: <http://www.nature.com/doi/10.1038/nature24277>
19. Miller KL, Alfaro-Almagro F, Bangerter NK, et al. Multimodal population brain imaging in the UK Biobank prospective epidemiological study. *Nat Neurosci* 2016;19(11):1523–36.
20. Alfaro-Almagro F, Jenkinson M, Bangerter NK, et al. Image processing and Quality Control for the first 10,000 brain imaging datasets from UK Biobank. *Neuroimage* 2018;166:400–24.
21. Elliott LT, Sharp K, Alfaro-Almagro F, et al. Genome-wide association studies of brain imaging phenotypes in UK Biobank. *Nature* [Internet] 2018;562(7726):210–6. Available from: <https://doi.org/10.1038/s41586-018-0571-7>
22. Behrens TEJ, Woolrich MW, Jenkinson M, et al. Characterization and Propagation of Uncertainty in Diffusion-Weighted MR Imaging. *Magn Reson Med* 2003;50(5):1077–88.

## Supplementary Tables

**Supplementary Table S1. Results of the permutation analysis for microtubule/cytoskeletal genes.** We took a set of 154,385 LD-pruned SNPs across all 22 autosomes, and randomly permuted them 10,000 times into sets of four SNPs. For each set of four SNPs, we counted the number of times that at least one gene from the gene set 'Microtubule Cytoskeleton Organisation' (GO:0000226) was within +/- 1Mb of each SNP in the set. We calculated the probability of 3 out of 4 SNPs within a randomly permuted set of 4 SNPs having a microtubule gene within +/- 1 Mb to be  $(273+26)/10,000 = 0.0299$ .

| <b>Number of SNPs (per set of 4 SNPs) with a microtubule or cytoskeletal gene within +/- 1Mb</b> | <b>Occurrences</b> |
|--------------------------------------------------------------------------------------------------|--------------------|
| 0                                                                                                | 3999               |
| 1                                                                                                | 4088               |
| 2                                                                                                | 1614               |
| 3                                                                                                | 273                |
| 4                                                                                                | 26                 |

**Supplementary Table S2. MAGMA Gene-Set Analysis.** A MAGMA analysis was performed on the summary statistics in the left- vs right-handers GWAS. MAGMA gene-set analysis was performed for curated gene sets and GO terms obtained from MsigDB v6.1 (10655 gene sets - curated gene sets: 4738, GO terms: 5917). The top 10 significant gene sets with a Bonferroni-corrected p-value of  $< 0.05$  are shown, and these have been ranked by numbers of genes overlapped.

| Gene set                                                             | Number of genes overlapped | beta  | SE     | p          |
|----------------------------------------------------------------------|----------------------------|-------|--------|------------|
| GO_bp:go_neuron_projection_morphogenesis                             | 383                        | 0.153 | 0.0437 | 0.0002392  |
| GO_bp:go_cell_morphogenesis_involved_in_neuron_differentiation       | 351                        | 0.169 | 0.0463 | 0.00013186 |
| GO_bp:go_neuron_migration                                            | 104                        | 0.281 | 0.0875 | 0.00065329 |
| GO_bp:go_regulation_of_gliogenesis                                   | 88                         | 0.305 | 0.0936 | 0.00057226 |
| Curated_gene_sets:kyng_environmental_stress_response_up              | 51                         | 0.352 | 0.111  | 0.00073219 |
| Curated_gene_sets:smid_breast_cancer_relapse_in_lung_dn              | 37                         | 0.461 | 0.125  | 0.00011341 |
| GO_bp:go_sympathetic_nervous_system_development                      | 20                         | 0.685 | 0.197  | 0.00025144 |
| Curated_gene_sets:reactome_sema3a_pak_dependent_axon_repulsion       | 13                         | 0.745 | 0.215  | 0.0002605  |
| Curated_gene_sets:kyng_environmental_stress_response_not_by_uv_in_ws | 12                         | 0.857 | 0.262  | 0.00054208 |
| Curated_gene_sets:castellano_hras_and_nras_targets_dn                | 7                          | 0.892 | 0.266  | 0.00040276 |

**Supplementary Table S3. Full results of SNP-based enrichment analysis with XGR.** Table demonstrating the results of SNP-based enrichment analysis using 4,007 SNPs in the left- vs right-handers GWAS with a p-value suggestive of association ( $p < 5 \times 10^{-5}$ ). The ontologies are ranked by False Discovery Rate, and the table also shows the Z-score, p-value and the number of SNPs overlapped with each ontological term.

| Term Name                                                                | Z-score | p         | False Discovery Rate | Number of SNPs overlapped |
|--------------------------------------------------------------------------|---------|-----------|----------------------|---------------------------|
| Parkinson's disease                                                      | 26.5    | 6.60E-21  | 2.60E-19             | 12                        |
| neurodegenerative disease                                                | 11.6    | 1.40E-13  | 2.80E-12             | 15                        |
| intra cranial volume                                                     | 35      | 2.00E-11  | 2.60E-10             | 3                         |
| Miscellaneous movement disorder due to genetic neurodegenerative disease | 19.4    | 7.10E-09  | 5.50E-08             | 3                         |
| Frontotemporal neurodegeneration with movement disorder                  | 19.4    | 7.10E-09  | 5.50E-08             | 3                         |
| Rare genetic movement disorder                                           | 17.8    | 1.50E-08  | 9.80E-08             | 3                         |
| movement disorder                                                        | 17.4    | 1.90E-08  | 1.00E-07             | 3                         |
| Corticobasal degeneration                                                | 21.2    | 5.80E-08  | 2.80E-07             | 2                         |
| Rare genetic neurological disorder                                       | 10.5    | 0.0000011 | 0.0000048            | 3                         |
| genetic disorder                                                         | 6.56    | 0.0000078 | 0.00003              | 5                         |
| multiple system atrophy                                                  | 9.86    | 0.0000083 | 0.00003              | 2                         |
| brain volume measurement                                                 | 7.2     | 0.000018  | 0.000059             | 3                         |
| Atrophy                                                                  | 6.4     | 0.000099  | 0.0003               | 2                         |
| ovarian neoplasm                                                         | 5.75    | 0.00018   | 0.00046              | 2                         |
| ovarian carcinoma                                                        | 5.75    | 0.00018   | 0.00046              | 2                         |
| ovarian disease                                                          | 4.88    | 0.00042   | 0.001                | 2                         |
| celiac disease                                                           | 4.52    | 0.00061   | 0.0014               | 2                         |
| brain measurement                                                        | 3.52    | 0.0016    | 0.0035               | 3                         |
| tauopathy                                                                | 3.18    | 0.0024    | 0.0049               | 4                         |
| bone density                                                             | 2.8     | 0.0052    | 0.01                 | 2                         |
| bone fracture related measurement                                        | 2.7     | 0.006     | 0.011                | 2                         |

|                             |        |       |       |   |
|-----------------------------|--------|-------|-------|---|
| bone measurement            | 2.17   | 0.013 | 0.023 | 2 |
| Alzheimer's disease         | 2.18   | 0.014 | 0.023 | 3 |
| inflammatory bowel disease  | 2.1    | 0.015 | 0.025 | 3 |
| urogenital neoplasm         | 1.66   | 0.028 | 0.044 | 2 |
| body mass index             | 1.6    | 0.035 | 0.052 | 3 |
| digestive system disease    | 1.57   | 0.039 | 0.057 | 4 |
| skin disease                | 1.31   | 0.049 | 0.068 | 2 |
| body weights and measures   | 1.36   | 0.058 | 0.079 | 5 |
| reproductive system disease | 1.15   | 0.063 | 0.082 | 2 |
| metabolic disease           | 0.783  | 0.11  | 0.14  | 2 |
| lung disease                | 0.586  | 0.15  | 0.18  | 2 |
| schizophrenia               | 0.499  | 0.17  | 0.2   | 2 |
| epithelial neoplasm         | 0.405  | 0.19  | 0.21  | 2 |
| carcinoma                   | 0.405  | 0.19  | 0.21  | 2 |
| autoimmune disease          | 0.297  | 0.25  | 0.27  | 3 |
| cancer                      | -0.179 | 0.4   | 0.41  | 2 |
| respiratory system disease  | -0.193 | 0.4   | 0.41  | 2 |
| neoplasm                    | -0.34  | 0.47  | 0.47  | 2 |

**Supplementary Table S4. Genetic correlation results between handedness and 14 neuro-psychiatric phenotypes executed in LDHub.** GWAS summary statistics from the left- vs right-handers GWAS were compared against the GWAS summary statistics available on LDHub for neurological and psychiatric traits. Each row of the table demonstrates the two phenotypes being correlated, the PMID for the relevant GWAS, the trait category, the ethnicity of the participants in the relevant GWAS, correlation coefficient ( $r_g$ ), standard error (se), z-score (z) and p-value. Results are ranked by p-value.

| Trait 1    | Trait 2                                          | PMID     | Category     | Ethnicity | $r_g$   | se     | z       | p      |
|------------|--------------------------------------------------|----------|--------------|-----------|---------|--------|---------|--------|
| Handedness | Schizophrenia                                    | 25056061 | psychiatric  | Mixed     | 0.1324  | 0.0429 | 3.0828  | 0.0021 |
| Handedness | Parkinson's disease                              | 19915575 | neurological | European  | -0.2379 | 0.0884 | -2.6915 | 0.0071 |
| Handedness | Anorexia Nervosa                                 | 24514567 | psychiatric  | European  | 0.1504  | 0.059  | 2.5512  | 0.0107 |
| Handedness | Bipolar disorder                                 | 21926972 | psychiatric  | European  | 0.1548  | 0.0691 | 2.2415  | 0.025  |
| Handedness | PGC cross-disorder analysis                      | 23453885 | psychiatric  | European  | 0.1296  | 0.0644 | 2.0115  | 0.0443 |
| Handedness | Alzheimer's disease                              | 24162737 | neurological | European  | -0.186  | 0.1148 | -1.6209 | 0.105  |
| Handedness | Subjective well being                            | 27089181 | psychiatric  | European  | -0.1176 | 0.0741 | -1.5874 | 0.1124 |
| Handedness | Autism spectrum disorder                         | N/A      | psychiatric  | European  | 0.0997  | 0.0809 | 1.2328  | 0.2177 |
| Handedness | Attention deficit hyperactivity disorder (GC)    | 27663945 | psychiatric  | European  | 0.1371  | 0.1684 | 0.8142  | 0.4156 |
| Handedness | Attention deficit hyperactivity disorder (No GC) | 27663945 | psychiatric  | European  | 0.1354  | 0.1677 | 0.8076  | 0.4193 |
| Handedness | Major depressive disorder                        | 22472876 | psychiatric  | European  | 0.0686  | 0.097  | 0.7075  | 0.4792 |
| Handedness | Depressive symptoms                              | 27089181 | psychiatric  | European  | 0.0161  | 0.0627 | 0.2568  | 0.7973 |
| Handedness | Attention deficit hyperactivity disorder         | 20732625 | psychiatric  | European  | -0.0196 | 0.1371 | -0.1428 | 0.8865 |
| Handedness | Amyotrophic lateral sclerosis                    | 27455348 | neurological | European  | 0.0142  | 0.1234 | 0.1154  | 0.9081 |

**Supplementary Table S5. Significant associations between imaging-derived phenotypes (IDPs) and loci genome-wide (GW) associated with handedness.** We examined all significant associations, Bonferroni-corrected for multiple comparisons across all IDPs (n=3,144) and all GW significant loci (n=4). We identified several significant associations for one of the four loci (rs199512), especially in white matter tracts using diffusion MRI (dMRI) measures, and more particularly in the “superior longitudinal fasciculus” (in bold). Results are ranked by p-value.

| IDP (measure)          | IDP (location; hemisphere)                 | beta   | p      |
|------------------------|--------------------------------------------|--------|--------|
| dMRI - TBSS L3         | Anterior limb of internal capsule; R       | -0.100 | 3.0e-9 |
| dMRI - TBSS L1         | <b>Superior longitudinal fasciculus; R</b> | -0.100 | 3.4e-9 |
| dMRI - TBSS L3         | Anterior limb of internal capsule; L       | -0.098 | 9.8e-9 |
| dMRI - TBSS ICVF       | Superior fronto-occipital fasciculus; R    | 0.098  | 1.4e-8 |
| dMRI - ProbtrackX L1   | <b>Superior longitudinal fasciculus; R</b> | -0.091 | 1.5e-8 |
| dMRI - TBSS OD         | <b>Superior longitudinal fasciculus; R</b> | 0.100  | 5.5e-8 |
| dMRI - TBSS OD         | Posterior corona radiata; R                | 0.092  | 1.4e-7 |
| FreeSurfer (DKT atlas) | Lateraloccipital area; R                   | 0.077  | 1.5e-7 |
| dMRI - TBSS OD         | <b>Superior longitudinal fasciculus; L</b> | 0.099  | 2.5e-7 |
| FreeSurfer (DKT atlas) | Fusiform area; R                           | 0.069  | 4.0e-7 |
| dMRI - TBSS ICVF       | Superior fronto-occipital fasciculus; L    | 0.088  | 4.0e-7 |
| FreeSurfer (DKT atlas) | Lateraloccipital area; L                   | 0.074  | 4.8e-7 |
| dMRI - TBSS ICVF       | Anterior corona radiata; R                 | 0.090  | 5.3e-7 |
| dMRI - TBSS L1         | <b>Superior longitudinal fasciculus; L</b> | -0.090 | 5.4e-7 |
| dMRI - ProbtrackX L1   | Superior thalamic radiations; R            | -0.073 | 5.6e-7 |
| dMRI - TBSS ICVF       | Anterior corona radiata; L                 | 0.090  | 6.7e-7 |
| dMRI - ProbtrackX MD   | <b>Superior longitudinal fasciculus; R</b> | -0.086 | 7.1e-7 |
| FreeSurfer (DKT atlas) | Fusiform area; L                           | 0.069  | 7.6e-7 |
| dMRI - ProbtrackX ICVF | Forceps minor                              | 0.092  | 7.7e-7 |
| dMRI - TBSS ICVF       | Cingulum bundle; R                         | 0.090  | 8.2e-7 |
| dMRI - ProbtrackX MD   | Superior thalamic radiations; R            | -0.072 | 8.3e-7 |
| FreeSurfer (volume)    | Ventral diencephalon                       | 0.062  | 1.1e-6 |
| dMRI - TBSS FA         | Anterior limb of the internal capsule; L   | 0.090  | 1.7e-6 |

|                |                                         |        |        |
|----------------|-----------------------------------------|--------|--------|
| dMRI - TBSS L1 | Superior corona radiata; R              | -0.078 | 1.8e-6 |
| dMRI - TBSS L1 | External capsule; R                     | -0.083 | 1.8e-6 |
| dMRI - TBSS MD | Superior fronto-occipital fasciculus; L | -0.079 | 1.9e-6 |



**Supplementary Table S6. Significant associations between imaging-derived phenotypes (IDPs) and self-reported handedness.** We examined all significant associations, Bonferroni-corrected for multiple comparisons across all IDPs (n=3,144). We identified numerous significant associations, almost exclusively using rfMRI connectivity analysis. **A. Detailed table of top 10 results.** They were all obtained using rfMRI connectivity measures (either using an ICA decomposition of the fMRI data into d=25 or d=100 independent components, “ICA25” and “ICA100” respectively), i.e. functional connectivity between a pair of networks identified by a single “edge” number. The most prevalent network in the most significant IDPs associated with handedness is the language network in the right hemisphere (network 33 for ICA100, 21 for ICA25), encompassing Broca’s area (BA44 and 45), the regions around the superior temporal sulcus, as well as premotor and primary motor regions centred around the tongue and mouth. The equivalent network is split in two in the left hemisphere at higher dimension (network 28 and 09 for ICA100, 13 for ICA25). Those main results can be summarised by, in left-handers: (i) a stronger connectivity between right and left language network (in bold), as well as (ii) a weaker connectivity between the right language network and the default-mode network (DMN) and salience network (in bold and italics). **B. Table of all significant results.** Results are ranked by p-value.

| rfMRI (ICA dimension; edge) | Networks pair | Effect in left-handers* | r     | p       | Identification of the pair of networks involved; hemisphere                       |
|-----------------------------|---------------|-------------------------|-------|---------|-----------------------------------------------------------------------------------|
| ICA100; edge 524            | 28-33         | <b>Stronger</b>         | 0.12  | 5.2e-44 | <b>Language; L (mainly prefrontal, temporo-parietal)</b><br><b>Language; R</b>    |
| ICA100; edge 505            | 09-33         | <b>Stronger</b>         | 0.10  | 4.1e-31 | <b>Language; L (mainly temporal)</b><br><b>Language; R</b>                        |
| ICA25; edge 7               | 01-05         | Weaker                  | 0.10  | 2.7e-30 | DMN<br>Fronto-parietal; R                                                         |
| ICA25; edge 203             | 13-21         | <b>Stronger</b>         | 0.10  | 4.8e-28 | <b>Language; L</b><br><b>Language; R</b>                                          |
| ICA25; edge 191             | 01-21         | <i>Weaker</i>           | 0.09  | 1.9e-26 | <i>DMN</i><br><i>Language: R</i>                                                  |
| ICA100; edge 509            | 13-33         | <i>Weaker</i>           | 0.09  | 7.1e-26 | <i>Dorsal prefrontal (part of DMN)</i><br><i>Language; R</i>                      |
| ICA100; edge 525            | 29-33         | <i>Weaker</i>           | -0.09 | 5.1e-25 | <i>Temporo-parietal junction (part of DMN)</i><br><i>Language: R</i>              |
| ICA100; edge 138            | 02-18         | Stronger                | 0.09  | 1.6e-24 | Salience<br>Premotor and inferior parietal lobule; L                              |
| ICA100; edge 498            | 02-33         | <i>Weaker</i>           | -0.08 | 2.2e-19 | <i>Salience</i><br><i>Language; R</i>                                             |
| ICA25; edge 176             | 05-20         | Weaker                  | -0.08 | 2.0e-18 | Fronto-parietal; R<br>Precuneus and posterior intra-parietal sulcus (part of DMN) |

\*Determined by combining the values of functional connectivity (positive or negative) with the corresponding r values.

| IDP (measure)        | IDP (location)    | r     | p-value |
|----------------------|-------------------|-------|---------|
| rfMRI - connectivity | ICA100; edge 524  | 0.12  | 5.2E-44 |
| rfMRI - connectivity | ICA100; edge 505  | 0.10  | 4.1E-31 |
| rfMRI - connectivity | ICA25; edge 7     | 0.10  | 2.7E-30 |
| rfMRI - connectivity | ICA25; edge 203   | 0.10  | 4.8E-28 |
| rfMRI - connectivity | ICA25; edge 191   | 0.09  | 1.9E-26 |
| rfMRI - connectivity | ICA100; edge 509  | 0.09  | 7.1E-26 |
| rfMRI - connectivity | ICA100; edge 525  | -0.09 | 5.1E-25 |
| rfMRI - connectivity | ICA100; edge 138  | 0.09  | 1.6E-24 |
| rfMRI - connectivity | ICA100; edge 498  | -0.08 | 2.2E-19 |
| rfMRI - connectivity | ICA25; edge 176   | -0.08 | 2.0E-18 |
| rfMRI - connectivity | ICA25; edge 72    | -0.08 | 7.2E-18 |
| rfMRI - connectivity | ICA25; edge 15    | 0.08  | 7.9E-18 |
| rfMRI - connectivity | ICA100; edge 929  | 0.07  | 2.1E-17 |
| rfMRI - connectivity | ICA25; edge 210   | -0.07 | 6.8E-17 |
| rfMRI - connectivity | ICA100; edge 60   | 0.07  | 9.3E-17 |
| rfMRI - connectivity | ICA100; edge 165  | -0.07 | 1.5E-16 |
| rfMRI - connectivity | ICA100; edge 501  | 0.07  | 2.6E-16 |
| rfMRI - connectivity | ICA100; edge 8    | -0.07 | 8.2E-16 |
| rfMRI - connectivity | ICA100; edge 663  | -0.07 | 9.2E-16 |
| rfMRI - connectivity | ICA100; edge 515  | -0.07 | 2.8E-15 |
| rfMRI - connectivity | ICA100; edge 360  | -0.07 | 5.5E-15 |
| rfMRI - connectivity | ICA100; edge 353  | 0.07  | 8.0E-15 |
| rfMRI - connectivity | ICA100; edge 1107 | 0.07  | 2.2E-14 |
| rfMRI - connectivity | ICA100; edge 522  | 0.07  | 6.5E-14 |
| rfMRI - connectivity | ICA25; edge 206   | -0.06 | 1.6E-13 |
| rfMRI - connectivity | ICA25; edge 177   | 0.06  | 1.9E-13 |
| rfMRI - connectivity | ICA100; edge 1140 | 0.06  | 2.3E-13 |
| rfMRI - connectivity | ICA100; edge 103  | -0.06 | 2.7E-13 |
| rfMRI - connectivity | ICA100; edge 520  | 0.06  | 5.0E-13 |
| rfMRI - connectivity | ICA25; edge 207   | -0.06 | 1.1E-12 |
| rfMRI - connectivity | ICA25; edge 110   | -0.06 | 2.6E-12 |
| rfMRI - connectivity | ICA25; edge 196   | 0.06  | 2.9E-12 |

|                      |                   |       |         |
|----------------------|-------------------|-------|---------|
| rfMRI - connectivity | ICA100; edge 302  | -0.06 | 3.5E-12 |
| rfMRI - connectivity | ICA100; edge 518  | -0.06 | 1.9E-11 |
| rfMRI - connectivity | ICA100; edge 915  | 0.06  | 2.3E-11 |
| rfMRI - connectivity | ICA25; edge 29    | -0.06 | 5.5E-11 |
| rfMRI - connectivity | ICA100; edge 628  | -0.06 | 7.8E-11 |
| rfMRI - connectivity | ICA100; edge 47   | 0.05  | 4.2E-10 |
| rfMRI - connectivity | ICA100; edge 1161 | -0.05 | 4.4E-10 |
| rfMRI - connectivity | ICA100; edge 513  | 0.05  | 6.3E-10 |
| rfMRI - connectivity | ICA100; edge 57   | 0.05  | 7.1E-10 |
| rfMRI - connectivity | ICA100; edge 517  | 0.05  | 7.9E-10 |
| rfMRI - amplitudes   | ICA100; node 12   | -0.05 | 1.1E-09 |
| rfMRI - connectivity | ICA25; edge 114   | 0.05  | 1.4E-09 |
| rfMRI - connectivity | ICA100; edge 377  | -0.05 | 1.6E-09 |
| rfMRI - connectivity | ICA100; edge 315  | -0.05 | 1.7E-09 |
| rfMRI - connectivity | ICA100; edge 325  | 0.05  | 4.2E-09 |
| rfMRI - connectivity | ICA100; edge 201  | 0.05  | 4.6E-09 |
| rfMRI - amplitudes   | ICA25; node 13    | -0.05 | 7.7E-09 |
| rfMRI - connectivity | ICA25; edge 75    | -0.05 | 2.9E-08 |
| rfMRI - connectivity | ICA100; edge 759  | -0.05 | 4.3E-08 |
| rfMRI - connectivity | ICA100; edge 546  | 0.05  | 5.2E-08 |
| rfMRI - connectivity | ICA100; edge 321  | -0.05 | 6.6E-08 |
| rfMRI - connectivity | ICA100; edge 222  | -0.05 | 9.0E-08 |
| rfMRI - connectivity | ICA100; edge 311  | 0.05  | 1.0E-07 |
| rfMRI - connectivity | ICA100; edge 362  | 0.05  | 1.7E-07 |
| rfMRI - connectivity | ICA100; edge 454  | 0.05  | 1.9E-07 |
| rfMRI - connectivity | ICA100; edge 164  | -0.05 | 2.3E-07 |
| rfMRI - connectivity | ICA25; edge 11    | -0.04 | 2.8E-07 |
| rfMRI - connectivity | ICA25; edge 71    | 0.04  | 3.2E-07 |
| rfMRI - connectivity | ICA100; edge 587  | -0.04 | 5.2E-07 |
| rfMRI - connectivity | ICA100; edge 606  | -0.04 | 9.0E-07 |
| rfMRI - connectivity | ICA25; edge 50    | 0.04  | 1.0E-06 |
| rfMRI - connectivity | ICA100; edge 324  | 0.04  | 1.1E-06 |
| rfMRI - connectivity | ICA100; edge 932  | -0.04 | 1.8E-06 |

|                      |                     |       |         |
|----------------------|---------------------|-------|---------|
| rfMRI - connectivity | ICA100; edge 337    | 0.04  | 2.0E-06 |
| rfMRI - connectivity | ICA100; edge 731    | -0.04 | 2.4E-06 |
| rfMRI - connectivity | ICA100; edge 658    | 0.04  | 3.1E-06 |
| dMRI - TBSS MO       | External capsule; L | -0.04 | 3.6E-06 |
| rfMRI - connectivity | ICA100; edge 309    | -0.04 | 3.8E-06 |
| rfMRI - connectivity | ICA25; edge 133     | 0.04  | 3.8E-06 |
| rfMRI - connectivity | ICA25; edge 84      | 0.04  | 4.3E-06 |
| rfMRI - connectivity | ICA100; edge 132    | 0.04  | 5.0E-06 |
| rfMRI - connectivity | ICA100; edge 831    | 0.04  | 5.5E-06 |
| rfMRI - amplitudes   | ICA100; node 28     | -0.04 | 5.7E-06 |
| rfMRI - connectivity | ICA100; edge 594    | -0.04 | 5.9E-06 |

## Supplementary Figures

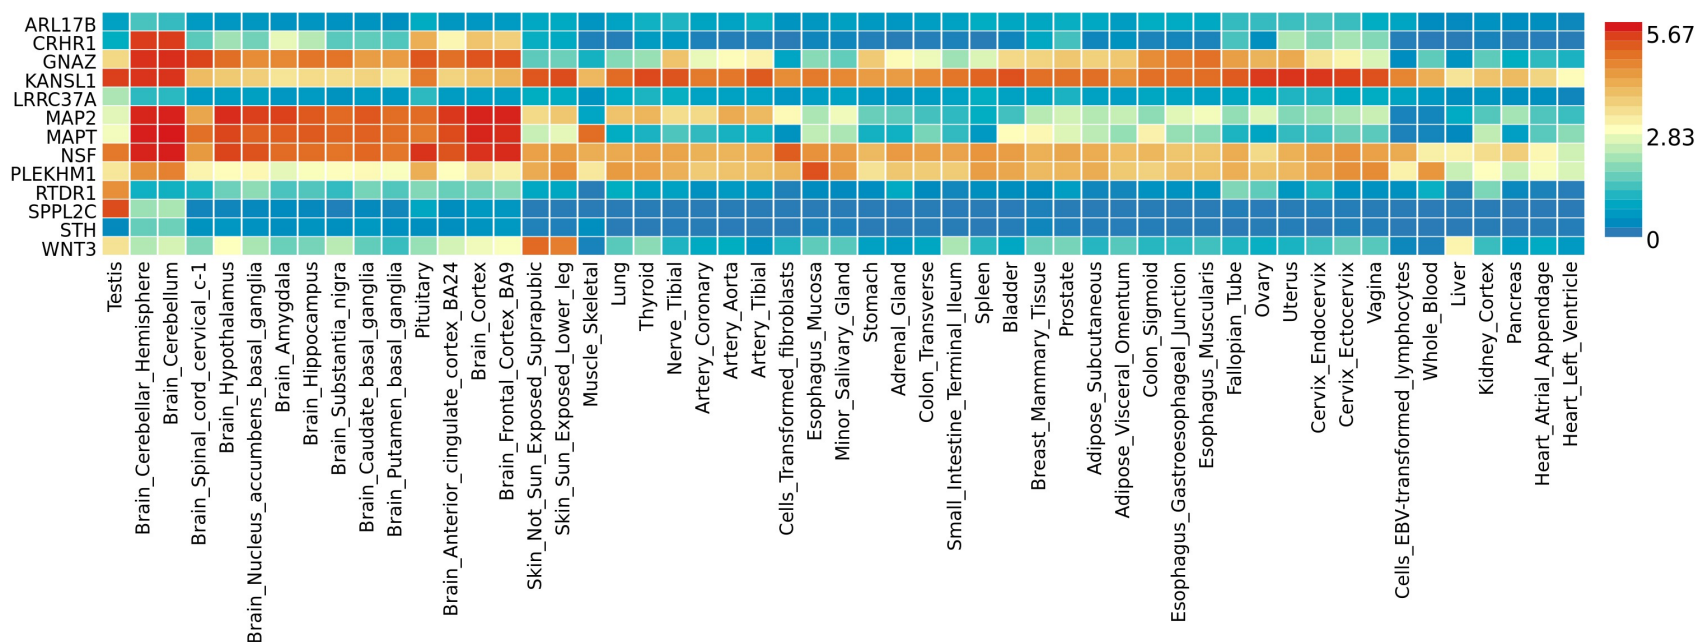

**Supplementary Figure S1. Heat map of gene expression across 53 tissue types.** This analysis was implemented in FUMA, and demonstrates the average expression values of the 13 genes positionally mapped by FUMA in the left- vs right-handers GWAS, across 53 tissue types in GTEx v7. This is an averaged expression value per tissue type per gene following winsorization at 50 and log 2 transformation with pseudocount 1. The expression value is in Transcripts per Million, and genes have been organised by hierarchical clustering.

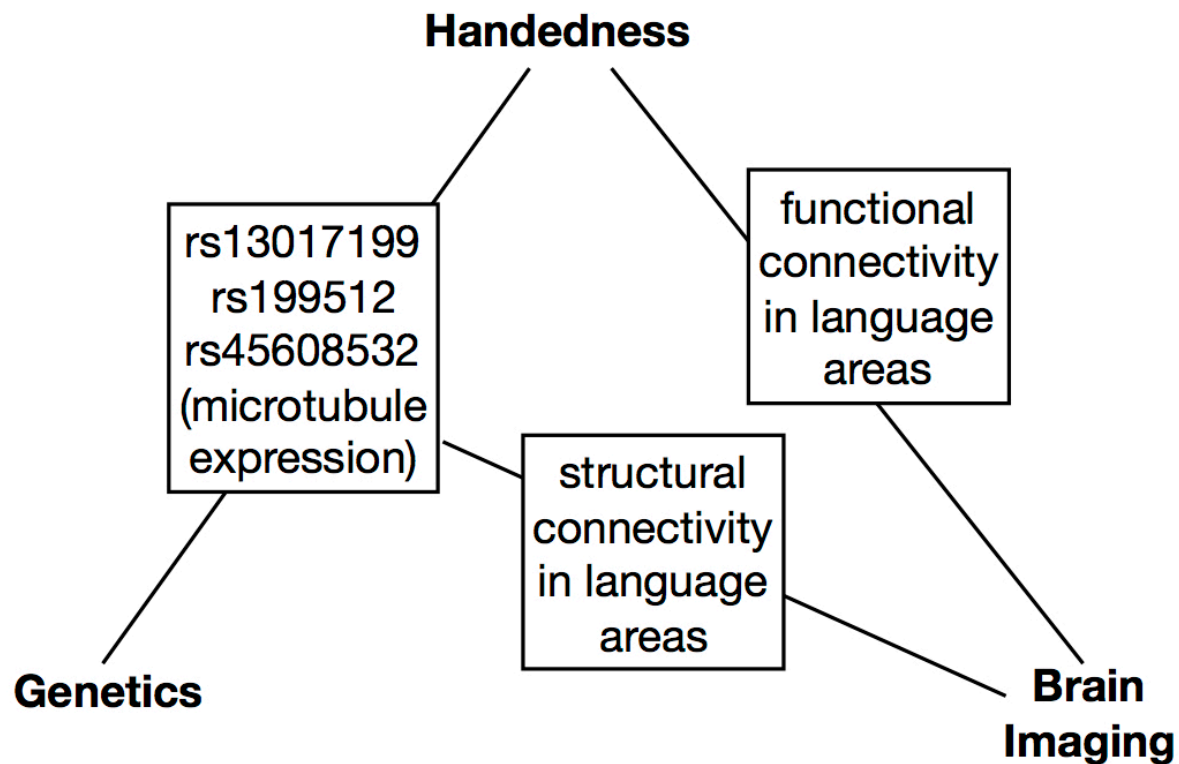

Supplementary Figure S2. Summary of results from the genetics-handedness, genetics-brain imaging, and handedness-brain imaging studies.
